# Supplementary material
Source: publisher figshare collection journal article supplement (https://acs.figshare.com/ndownloader/files/5759586)
Supplement: Supplementary file 1 [file 5759586]

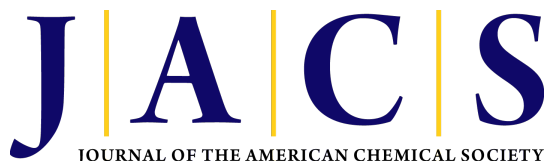

JOURNAL OF THE AMERICAN CHEMICAL SOCIETY

J. Am. Chem. Soc., 1998, 120(34), 8692-8701, DOI:[10.1021/ja9807892](https://doi.org/10.1021/ja9807892)

#### Terms & Conditions

Electronic Supporting Information files are available without a subscription to ACS Web Editions. The American Chemical Society holds a copyright ownership interest in any copyrightable Supporting Information. Files available from the ACS website may be downloaded for personal use only. Users are not otherwise permitted to reproduce, republish, redistribute, or sell any Supporting Information from the ACS website, either in whole or in part, in either machine-readable form or any other form without permission from the American Chemical Society. For permission to reproduce, republish and redistribute this material, requesters must process their own requests via the RightsLink permission system. Information about how to use the RightsLink permission system can be found at <http://pubs.acs.org/page/copyright/permissions.html>

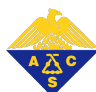

ACS Publications

MOST TRUSTED. MOST CITED. MOST READ.

Copyright © 1998 American Chemical Society

# New Strategies in Carbonylation Chemistry: The Synthesis of $\delta$ -Lactones from *Saturated* Alcohols and CO

Shinji Tsunoi,<sup>†</sup> Ilhyong Ryu,\* Tohru Okuda, Minoru Tanaka,<sup>†</sup> Mitsuo Komatsu, and Noboru Sonoda<sup>‡</sup>

*Department of Applied Chemistry, Faculty of Engineering, Osaka University,  
Suita, Osaka 565-0871, Japan*

*<sup>†</sup>Research Center for Environmental Preservation, Osaka University,  
Suita, Osaka 565-0871, Japan*

## Supporting Information

The structure assignments was obtained on the basis of a combination of DEPT, and  $^{13}\text{C}$ - $^1\text{H}$  COSY experiments. The separation of *cis/trans* isomers was performed by preparative HPLC (GPC columns (JAIGEL 1H and 2H) using  $\text{CHCl}_3$  as an eluent). Alcohols, **1g**, **1o**, and **1p**, were prepared by the hydrogenation of the corresponding aromatic alcohols, 2-phenyl-1-propanol, 1-phenyl-2-propanol, and *trans*-2-phenyl-1-cyclohexanol with 5% Rh/C.

**General Procedure for Hydrogenation of Aromatic Alcohol.** A mixture of *trans*-2-phenyl-1-cyclohexanol (881 mg, 5 mmol) and 5% Rh/C (515 mg, 0.25 mmol) and anhydrous THF (10 mL, freshly distilled from sodium benzophenone ketyl) were stirred at room temperature with bubbling of hydrogen for 15 h. The reaction mixture was filtered and concentrated. The residue was chromatographed to give *trans*-2-cyclohexyl-1-cyclohexanol **1p** (902 mg, 99% yield) as a white crystal:  $^1\text{H}$  NMR ( $\text{CDCl}_3$ , 270 MHz)  $\delta$  0.92-1.43 (complex m, 10H), 1.42 (br s, 2H), 1.60-1.80 (complex m, 8H), 1.98 (m, 1H), 3.43 (dt-like, 1H,  $J \sim 10.0$ , 4.3 Hz);  $^{13}\text{C}$  NMR ( $\text{CDCl}_3$ , 68 MHz)  $\delta$  24.97, 25.32, 25.95, 26.91 (two superimposed lines), 27.17, 27.31, 31.53, 36.33, 37.10, 50.69, 71.15.

**Procedure for Control Experiments (Tables 1 and 4).** A mixture of 1-octanol (**1a**) (2,6-dimethyl-4-heptanol (**1q**) for Table 4), LTA and benzene were placed in a stainless steel autoclave lined with a round bottomed glass tube. The autoclave was sealed, purged twice

with 10 atm of carbon monoxide, and then pressurized with CO, and was heated, with stirring. After one day (three days for **1q**), excess CO was purged at room temperature, then the reaction mixture was poured into 0.4 N aqueous hydrogen chloride. The aqueous layer was extracted with ether (3 x 20 mL) and the combined ether extracts were dried (MgSO<sub>4</sub>), then filtered. The filtrate was analyzed by GC. Yields of **2a** and **3a** (**2q** and **1q** for Table 4) were quantified using an internal standard (cyclohexyl acetate) and the separated samples to calibrate the response of the detector.

**Tetrahydro-3-butyl-2H-pyran-2-one (2a):** According to the general procedure, the title compound **2a** was obtained in 51% yield: a slightly yellow liquid; <sup>1</sup>H NMR (CDCl<sub>3</sub>, 270 MHz) δ 0.91 (t, 3H, *J* = 6.8 Hz), 1.25-1.61 (m, 6H), 1.84-1.90 (m, 3H), 2.00-2.16 (m, 1H), 2.34-2.51 (m, 1H, α-CH), 4.25-4.32 (td-like, 2H, *J* ~ 5.9, 2.0 Hz); <sup>13</sup>C NMR (CDCl<sub>3</sub>, 68 MHz) δ 13.86 (q), 21.95 (t), 22.56 (t), 24.54 (t), 28.95 (t), 30.89 (t), 39.50 (d), 68.26 (t), 174.68 (s); IR(neat) 1732 cm<sup>-1</sup>; EIMS (relative intensity) *m/z* 157 (*M*<sup>+</sup>+1, 2), 127 (2), 113 (26), 100 (100), 85 (4), 73 (5), 55 (20), 41 (14); HREIMS calcd for C<sub>9</sub>H<sub>16</sub>O<sub>2</sub> *m/z* 156.1150, found 156.1155. This compound is already known and the properties (<sup>1</sup>H NMR and IR) were consistent with those previously reported.<sup>1</sup> The less polar fraction furnished a mixture of octyl acetate and 2-butyltetrahydrofuran (**3a**). Further purification of the mixture by preparative HPLC gave pure **3a**: a colorless liquid; <sup>1</sup>H NMR (CDCl<sub>3</sub>, 270 MHz) δ 0.90 (t, 3H, *J* = 6.9 Hz), 1.20-1.60 (complex m, 7H), 1.75-2.00 (complex m, 3H), 3.66-3.90 (complex m, 3H); <sup>13</sup>C NMR (CDCl<sub>3</sub>, 68 MHz) δ 13.86, 22.64, 25.55, 28.43, 31.23, 35.29, 67.37, 79.25.; HREIMS calcd for C<sub>8</sub>H<sub>16</sub>O *m/z* 128.1201, found 128.1195. This compound is already known.<sup>2</sup>

**Tetrahydro-3-propyl-2H-pyran-2-one (2b):** a slightly yellow liquid; <sup>1</sup>H NMR (CDCl<sub>3</sub>, 270 MHz) δ 0.91 (t, 3H, *J* = 7.1 Hz), 1.33-1.61 (m, 4H), 1.87-1.95 (m, 3H), 2.04-2.16 (m, 1H), 2.44-2.50 (m, 1H), 4.30 (td, 2H, *J* = 2.0, 5.9 Hz); <sup>13</sup>C NMR (CDCl<sub>3</sub>, 68 MHz) δ 13.91 (q), 19.96 (t), 21.95 (t), 24.53 (t), 33.32 (t), 39.27 (d), 68.28 (t), 174.68 (s); IR(neat) 1734 cm<sup>-1</sup>; EIMS (relative intensity) *m/z* 143 (*M*<sup>+</sup>+1, 1), 113 (20), 100 (100), 95 (5), 84 (5), 73 (4), 69 (5),

---

(1) Paterson, I. *Tetrahedron* **1988**, *44*, 4207.

(2) Kharrat, A.; Gardrat, C.; Maillard, B. *Can. J. Chem.* **1984**, *62*, 2385.

55 (23), 41 (15); HREIMS calcd for  $C_8H_{14}O_2$   $m/z$  142.0993, found 142.1018. This compound is already known.<sup>3</sup>

**cis- and trans-Octahydro-1H-2-benzopyran-1-one (2f).** Obtained as a *cis/trans*-isomer mixture in a 44/56 ratio: a colorless liquid;  $^1H$  NMR ( $CDCl_3$ , 270 MHz)  $\delta$  1.05-2.30 (m, *cis* 11H and *trans* 12H), 2.72 (t-like, *cis* 1H,  $J = 4.9$  Hz,  $\alpha$ -CH), 4.22-4.42 (m, *cis* 2H and *trans* 2H);  $^{13}C$  NMR ( $CDCl_3$ , 68 MHz)  $\delta$  22.39 (t, *cis*), 24.50 (t, *cis*), 25.26 (t, *trans*), 25.66 (t, *cis* or *trans*), 25.72 (t, *cis* or *trans*), 26.68 (t, *trans*), 28.15 (t, *cis*), 29.59 (t, *trans*), 31.15 (t, *cis*), 31.82 (d, *cis*,  $\beta$ -CH), 33.45 (t, *trans*), 36.25 (d, *trans*,  $\beta$ -CH), 40.10 (d, *cis*,  $\alpha$ -CH), 45.14 (d, *trans*,  $\alpha$ -CH), 66.59 (t, *cis*), 67.71 (t, *trans*), 173.71 (s, *trans*), 174.27 (s, *cis*); IR(neat)  $1737\text{ cm}^{-1}$ ; EIMS (relative intensity)  $m/z$  154 ( $M^+$ , 77), 126 (33), 99 (91), 81 (84), 67 (100), 54 (30), 41 (29); HREIMS calcd for  $C_9H_{14}O_2$   $m/z$  154.0994, found 154.0990. These compounds are already known and the properties ( $^1H$  and  $^{13}C$  NMR) were consistent with those previously reported.<sup>4</sup>

**Tetrahydro-6-methyl-3-(1-methylethyl)-2H-pyran-2-one (2m).** Obtained as a *cis/trans*-isomer mixture in a 52/48 ratio. These isomers were separated by preparative HPLC. **cis-2m:** a slightly yellow liquid;  $^1H$  NMR ( $CDCl_3$ , 270 MHz)  $\delta$  0.92 (d, 3H,  $J = 6.3$  Hz,  $CH_3$  of 2-propyl), 0.97 (d, 3H,  $J = 6.8$  Hz,  $CH_3$  of 2-propyl), 1.35 (d, 3H,  $J = 6.4$  Hz,  $CH_3CHO$ ), 1.43-1.70 (m, 2H), 1.80-2.00 (m, 2H), 2.38 (m, 1H,  $\alpha$ -CH), 2.50 (m, 1H, CH of 2-propyl), 4.36 (m, 1H,  $\delta$ -CH);  $^{13}C$  NMR ( $CDCl_3$ , 68 MHz)  $\delta$  17.94 (q,  $CH_3$  of 2-propyl), 19.78 (q,  $CH_3$  of 2-propyl), 20.11 (t), 22.07 (q,  $CH_3CHO$ ), 29.02 (d, CH of 2-propyl), 30.56 (t), 46.35 (d,  $\alpha$ -CH), 77.29 (d,  $\delta$ -CH), 173.25 (s); IR(neat)  $1728\text{ cm}^{-1}$ ; EIMS (relative intensity)  $m/z$  156 ( $M^+$ , 4), 141 (17), 114 (100), 101 (21), 84 (27), 73 (55), 55 (39); HREIMS calcd for  $C_9H_{16}O_2$   $m/z$  156.1150, found 156.1142. This compound is already known and the properties ( $^1H$  NMR) were consistent with those previously reported.<sup>5</sup> **trans-2m:** a slightly yellow liquid;  $^1H$  NMR ( $CDCl_3$ , 270 MHz)  $\delta$  0.94 (d, 3H,  $J = 6.8$  Hz,  $CH_3$  of 2-propyl), 1.01 (d, 3H,  $J = 6.8$  Hz,  $CH_3$  of

---

(3) Kurata, K.; Tanaka, S.; Takahashi, K. *Chem. Pharm. Bull.* **1976**, *24*, 538.

(4) Fujiwara, Y.; Okamoto, M. *Chem. Pharm. Bull.* **1989**, *37*, 1458.

(5) Bach, M. D.; Bosch, E. *J. Org. Chem.* **1992**, *57*, 4696.

2-propyl), 1.34 (d, 3H,  $J = 5.9$  Hz,  $\text{CH}_3\text{CHO}$ ), 1.50-1.75 (m, 2H), 1.94 (m, 2H), 2.29 (m, 2H, CH of 2-propyl and  $\alpha$ -CH), 4.45 (m, 1H,  $\delta$ -CH);  $^{13}\text{C}$  NMR ( $\text{CDCl}_3$ , 68 MHz)  $\delta$  18.25 (q,  $\text{CH}_3$  of 2-propyl), 18.51 (t), 20.57 (q,  $\text{CH}_3$  of 2-propyl), 21.03 (q,  $\text{CH}_3\text{CHO}$ ), 27.95 (d, CH of 2-propyl), 28.70 (t), 43.93 (d,  $\alpha$ -CH), 74.04 (d,  $\delta$ -CH), 174.61 (s); IR(neat)  $1724\text{ cm}^{-1}$ ; EIMS (relative intensity)  $m/z$  156 ( $\text{M}^+$ , 7), 141 (22), 114 (100), 101 (23), 84 (27), 73 (55), 55 (46); HREIMS calcd for  $\text{C}_9\text{H}_{16}\text{O}_2$   $m/z$  156.1150, found 156.1148. This compound is already known and the properties ( $^1\text{H}$  NMR and MS) were consistent with those previously reported.<sup>5</sup>

**Tetrahydro-3,6-dimethyl-2H-pyran-2-one (2n).** Obtained as a *cis/trans*-isomer mixture in a 55/45 ratio. These isomers were separated by preparative HPLC. ***cis*-(2*S*, 5*R*)-2n:** a crystal; mp. 51-51.5 °C;  $^1\text{H}$  NMR ( $\text{CDCl}_3$ , 270 MHz)  $\delta$  1.22 (d, 3H,  $J = 6.9$  Hz, 2-Me), 1.36 (d, 3H,  $J = 6.4$  Hz, 5-Me), 1.40-1.70 (m, 2H), 1.80-2.20 (m, 2H), 2.55-2.64 (m, 1H,  $\alpha$ -CH), 4.43-4.51 (m, 1H,  $\delta$ -CH);  $^{13}\text{C}$  NMR ( $\text{CDCl}_3$ , 68 MHz)  $\delta$  16.11 (q, 2-Me), 21.00 (q, 5-Me), 25.53 (t), 28.32 (t), 32.88 (d,  $\alpha$ -CH), 74.34 (d,  $\delta$ -CH), 176.16 (s); IR( $\text{CDCl}_3$ )  $1732\text{ cm}^{-1}$ ; EIMS (relative intensity)  $m/z$  128 ( $\text{M}^+$ , 5), 113 (4), 84 (43), 69 (20), 56 (100), 42 (50); HREIMS calcd for  $\text{C}_7\text{H}_{12}\text{O}_2$   $m/z$  128.0837, found 128.0824. This compound is already known and the properties (mp.,  $^1\text{H}$  and  $^{13}\text{C}$  NMR, IR, and MS) were consistent with those previously reported.<sup>6</sup> Optical yield was estimated by GC (column: Chiraldex G-TA 0.25 mm x 20 m). ***trans*-(2*R*, 5*R*)-2n:** a crystal; mp. 52-53 °C;  $^1\text{H}$  NMR ( $\text{CDCl}_3$ , 270 MHz)  $\delta$  1.30 (d, 3H,  $J = 6.9$  Hz, 2-Me), 1.37 (d, 3H,  $J = 6.4$  Hz, 5-Me), 1.46-1.67 (m, 2H), 1.87-2.10 (m, 2H), 2.39-2.48 (m, 1H,  $\alpha$ -CH), 4.40-4.48 (m, 1H,  $\delta$ -CH);  $^{13}\text{C}$  NMR ( $\text{CDCl}_3$ , 68 MHz)  $\delta$  17.23 (q, 2-Me), 22.03 (q, 5-Me), 28.43 (t), 30.89 (t), 35.65 (d,  $\alpha$ -CH), 78.10 (d,  $\delta$ -CH), 174.29 (s); IR( $\text{CDCl}_3$ )  $1720\text{ cm}^{-1}$ ; EIMS (relative intensity)  $m/z$  128 ( $\text{M}^+$ , 3), 113 (4), 84 (45), 69 (28), 56 (100), 2 (65); HREIMS calcd for  $\text{C}_7\text{H}_{12}\text{O}_2$   $m/z$  128.0837, found 128.0828. This compound is already known and the properties (mp.,  $^1\text{H}$  and  $^{13}\text{C}$  NMR, IR, and MS) were consistent with those previously reported.<sup>6</sup>

---

(6) (a) Wheeler, J. W.; Evans, S. L.; Blum, M. S.; Velthuis, H. H. V.; de Camargo, J. M. F. *Tetrahedron Lett.* **1976**, 4029. (b) Pirkle, W. H.; Adams, P. E. *J. Org. Chem.* **1979**, *44*, 2169. (c) Mori, K.; Senda, S. *Tetrahedron* **1985**, *41*, 541. (d) Bäckvall, J.-E.; Byström, S. E.; Nyström, J. E. *Tetrahedron* **1985**, *41*, 5761.

**Octahydro-3-methyl-1H-2-benzopyran-1-one (2o).** Obtained as a mixture of four diastereomers in a 22/26/24/28 ratio (600 MHz  $^1\text{H}$  NMR):  $^{13}\text{C}$  NMR ( $\text{CDCl}_3$ , 68 MHz)  $\delta$  20.88, 20.97, 22.08, 22.30, 22.36, 22.50, 24.10, 25.02, 25.06, 25.17, 25.22, 25.46, 25.92, 26.49 (two superimposed lines), 26.75, 28.23, 31.24, 32.75 (two superimposed lines), 32.84, 34.13, 34.25, 35.85, 35.96, 36.10, 37.00, 38.30, 38.69, 41.37, 42.79, 45.95, 72.36, 73.76, 73.93, 77.06, 172.96, 173.31, 174.91, 175.16. These compounds are already known and the properties ( $^1\text{H}$  and  $^{13}\text{C}$  NMR) were consistent with those previously reported.<sup>3</sup>

**cis- and trans-Tetrahydro-4-methyl-6-(2-methylpropyl)-2H-pyran-2-one (2q).** Obtained as a *cis/trans*-isomer mixture in a 59/41 ratio: a colorless liquid;  $^1\text{H}$  NMR ( $\text{CDCl}_3$ , 270 MHz)  $\delta$  0.93 (t, *cis* 6H and *trans* 6H,  $J = 6.3$  Hz), 1.02 (d, *cis* 3H,  $J = 5.9$  Hz), 1.09 (d, *trans* 3H,  $J = 6.4$  Hz), 1.15-2.23 (complex m, *cis* 7H and *trans* 7H), 2.32-2.73 (m, *cis* 1H and *trans* 1H,  $\alpha\text{-CHH}$ ), 4.29-4.39 (m, *cis* 1H,  $\delta\text{-CH}$ ), 4.42-4.52 (m, *trans* 1H,  $\delta\text{-CH}$ );  $^{13}\text{C}$  NMR ( $\text{CDCl}_3$ , 68 MHz)  $\delta$  21.43 (q, *trans*), 21.64 (q, *cis*), 22.02 (q, *cis* and *trans*), 22.93 (q, *trans*), 22.97 (q, *cis*), 23.80 (d, *trans*), 23.90 (d, *trans*), 24.18 (d, *cis*), 26.71 (d, *cis*), 35.45 (t, *trans*), 37.47 (t, *trans*), 37.55 (t, *cis*), 38.04 (t, *cis*), 44.59 (t, *trans*), 45.23 (t, *cis*), 75.50 (d, *trans*), 78.82 (d, *cis*), 171.51 (s, *cis*), 172.47 (s, *trans*); IR(neat)  $1732\text{ cm}^{-1}$ ; EIMS (relative intensity)  $m/z$  170 ( $\text{M}^+$ , 2), 152 (6), 128 (5), 113 (100), 85 (17), 69 (33), 56 (25), 43 (11); HREIMS calcd for  $\text{C}_{10}\text{H}_{18}\text{O}_2$   $m/z$  170.1307, found 170.1313. The *cis* isomer is already known and the properties ( $^1\text{H}$  and  $^{13}\text{C}$  NMR and MS) were consistent with those previously reported.<sup>7</sup>

**Tetrahydro-4-methyl-2H-pyran-2-one (2r):** a slightly yellow liquid;  $^1\text{H}$  NMR ( $\text{CDCl}_3$ , 600 MHz)  $\delta$  1.07 (d, 3H,  $J = 6.4$  Hz), 1.45-1.60 (m, 1H,  $\beta\text{-CH}$ ), 1.93 (ddq, 1H,  $J = 14.1, 1.5, 4.0$  Hz,  $\gamma\text{-CHH}$ ), 2.06-2.17 (m, 2H,  $\alpha\text{-CHHCO}$  and  $\gamma\text{-CHH}$ ), 2.68 (dddd, 1H,  $J = 22.1, 10.2, 1.4, 4.0$  Hz,  $\alpha\text{-CHH}$ ), 4.27 (ddd, 1H,  $J = 3.8, 10.7, 11.4$  Hz), 4.42 (ddd, 1H,  $J = 4.0, 4.9, 11.4$  Hz);  $^{13}\text{C}$  NMR ( $\text{CDCl}_3$ , 68 MHz)  $\delta$  21.41 (q), 26.55 (d,  $\beta\text{-CH}$ ), 30.61 (t,  $\gamma\text{-CH}_2$ ), 38.20 (t,  $\alpha\text{-CH}_2$ ), 68.52 (t), 171.19 (s); IR(neat)  $1728\text{ cm}^{-1}$ ; EIMS (relative intensity)  $m/z$  114 ( $\text{M}^+$ , 43),

(7) (a) Pittet, A. O.; Klaiber, E. M. *J. Agric. Food. Chem.* **1975**, *23*, 1189. (b) Bardili, B.; Marschall-Weyerstahl, H.; Weyerstahl, P. *Liebigs Ann. Chem.* **1985**, 275.

84 (12), 70 (40), 56 (70), 55 (98), 42 (100); HREIMS calcd for  $C_6H_{10}O_2$   $m/z$  114.0681, found 114.0695. This compound is already known and the properties ( $^1H$  and  $^{13}C$  NMR) were consistent with those previously reported.<sup>8</sup>

**cis- and trans-Tetrahydro-4,6-dimethyl-2H-pyran-2-one (2s).** Obtained as a *cis/trans*-isomer mixture in a 56/44 ratio: a slightly yellow liquid;  $^1H$  NMR ( $CDCl_3$ , 600 MHz)  $\delta$  1.03 (d, *cis* 3H,  $J$  = 6.4 Hz), 1.10 (d, *trans* 3H,  $J$  = 6.7 Hz), 1.21 (dt, *cis* 1H,  $J$  = 13.8, 11.5 Hz,  $\gamma$ -CHH), 1.37 (d, *cis* 3H,  $J$  = 6.3 Hz), 1.38 (d, *trans* 3H,  $J$  = 6.3 Hz), 1.62 (ddd, *trans* 1H,  $J$  = 4.2, 6.1, 14.1 Hz,  $\gamma$ -CHH), 1.76 (ddd, *trans* 1H,  $J$  = 6.4, 8.5, 14.2 Hz,  $\gamma$ -CHH), 1.93 (dm, *cis* 1H,  $J_{doublet}$  = 13.8 Hz,  $\gamma$ -CHH), 2.02 (dd, *cis* 1H,  $J$  = 16.8, 10.7 Hz,  $\alpha$ -CHH), 2.05 (m, *cis* 1H,  $\beta$ -CH), 2.15 (dd, *trans* 1H,  $J$  = 16.2, 8.9 Hz,  $\alpha$ -CHH), 2.20 (m, *trans* 1H,  $\beta$ -CH), 2.58 (dd, *trans* 1H,  $J$  = 16.2, 5.5 Hz,  $\alpha$ -CHH), 2.67 (ddd, *cis* 1H,  $J$  = 16.8, 4.8, 2.0 Hz,  $\alpha$ -CHH), 4.42 (ddq, *cis* 1H,  $J$  = 12.6, 2.9, 6.3 Hz,  $\delta$ -CH), 4.58 (ddq, *trans* 1H,  $J$  = 8.8, 4.4, 6.3 Hz,  $\delta$ -CH);  $^{13}C$  NMR ( $CDCl_3$ , 68 MHz)  $\delta$  21.17 (q,  $CH_3CHCO$  *trans*), 21.20 (q,  $CH_3CHCO$  *cis*), 21.44 (q,  $CH_3CHO$  *trans*), 21.69 (q,  $CH_3CHO$  *cis*), 23.55 (d,  $\beta$ -CH *trans*), 26.61 (d,  $\beta$ -CH *cis*), 36.43 (t, *trans*), 37.15 (t, *trans*), 37.61 (t,  $\alpha$ -CH<sub>2</sub> *cis*), 38.65 (t,  $\gamma$ -CH<sub>2</sub> *cis*), 73.47 (d, *trans*), 76.85 (d, *cis*), 171.41 (s, *cis*), 172.27 (s, *trans*); IR(neat) 1732  $cm^{-1}$ ; for *cis* isomer: EIMS (relative intensity)  $m/z$  128 ( $M^+$ , 11), 113 (20), 84 (56), 69 (45), 56 (100); for *trans* isomer: EIMS (relative intensity)  $m/z$  128 ( $M^+$ , 12), 113 (16), 84 (58), 69 (42), 56 (100); for *cis* isomer: HREIMS calcd for  $C_7H_{12}O_2$   $m/z$  128.0838, found 128.0843; for *trans* isomer: HREIMS calcd for  $C_7H_{12}O_2$   $m/z$  128.0838, found 128.0812. This compound is already known and the properties ( $^1H$  and  $^{13}C$  NMR) were consistent with those previously reported.<sup>9</sup>

**Tetrahydro-6-propyl-2H-pyran-2-one (2u):** a slightly yellow liquid;  $^1H$  NMR ( $CDCl_3$ , 600 MHz)  $\delta$  0.94 (t, 3H,  $J$  = 7.3 Hz,  $CH_3$ ), 1.39-1.46 (m, 1H), 1.47-1.60 (m, 3H), 1.66-1.74 (m,

---

(8) (a) Theisen, P. D.; Heathcock, C. H. *J. Org. Chem.* **1993**, *58*, 142. (b) Konoike, T.; Araki, Y. *J. Org. Chem.* **1994**, *59*, 7849.

(9) (a) Carroll, F. I.; Mitchell, G. N.; Blackwell, J. T.; Sobti, A.; Meck, R. *J. Org. Chem.* **1974**, *39*, 3890. (b) Pirkle, W. H.; Adams, P. E. *J. Org. Chem.* **1980**, *45*, 4117.

1H), 1.82-1.95 (m, 3H), 2.45 (ddd, 1H,  $J = 7.1, 8.8, 17.6$  Hz,  $\alpha$ -CHH), 2.59 (dddd, 1H,  $J = 1.3, 4.8, 7.9, 17.6$  Hz,  $\alpha$ -CHH), 4.30 (m, 1H,  $\delta$ -CH);  $^{13}\text{C}$  NMR ( $\text{CDCl}_3$ , 68 MHz)  $\delta$  13.76 (q,  $\text{CH}_3$ ), 18.10 (t), 18.42 (t), 27.72 (t), 29.39 (t), 37.82 (t), 80.27 (d), 171.96 (s); IR(neat)  $1732\text{ cm}^{-1}$ ; EIMS (relative intensity)  $m/z$  143 ( $M^+ + 1$ , 3), 124 (4), 114 (12), 99 (100), 70 (33), 55 (22), 42 (28); HREIMS calcd for  $\text{C}_8\text{H}_{14}\text{O}_2$   $m/z$  142.0994, found 142.0983. This compound is commercially available.

***cis*- and *trans*-Tetrahydro-3-methyl-6-propyl-2H-pyran-2-one (2x).** Obtained as a *cis/trans*-isomer mixture in a 47/53 ratio: an oil;  $^1\text{H}$  NMR ( $\text{CDCl}_3$ , 270 MHz)  $\delta$  0.94 (t, *cis* 3H and *trans* 3H,  $J = 6.8$  Hz), 1.22 (d, *cis* 3H,  $J = 6.8$  Hz), 1.30 (d, *trans* 3H,  $J = 7.3$  Hz), 1.35-1.76 (m, *cis* 6H and *trans* 6H), 1.88-2.13 (m, *cis* 2H and *trans* 2H), 2.39-2.49 (m, *trans* 1H), 2.56-2.66 (m, *cis* 1H), 4.25-4.33 (m, *cis* 1H and *trans* 1H);  $^{13}\text{C}$  NMR ( $\text{CDCl}_3$ , 68 MHz)  $\delta$  13.77 (q), 16.11 (q), 17.35 (q), 18.00 (t), 18.30 (t), 25.55 (t), 26.62 (t), 28.46 (t), 29.07 (t), 29.62 (t), 33.10 (d), 36.04 (d), 37.35 (t), 38.33 (t), 77.83 (d), 81.52 (d), 174.41 (s), 176.35 (s); IR(neat)  $1732\text{ cm}^{-1}$ ; EIMS (relative intensity) for *cis* isomer  $m/z$  156 ( $M^+$ , 2), 113 (100), 85 (62), 70 (53), 56 (84), 42 (48); EIMS (relative intensity) for *trans* isomer  $m/z$  156 ( $M^+$ , 1), 113 (100), 85 (58), 70 (54), 56 (66), 42 (49).; HREIMS for *cis* isomer calcd for  $\text{C}_9\text{H}_{16}\text{O}_2$   $m/z$  156.1150, found 156.1175.; HREIMS for *trans* isomer calcd for  $\text{C}_9\text{H}_{16}\text{O}_2$   $m/z$  156.1150, found 156.1159.

***cis*- and *trans*-Tetrahydro-3-ethyl-6-propyl-2H-pyran-2-one (2y).** Obtained as a *cis/trans*-isomer mixture in a 41/59 ratio: an oil;  $^1\text{H}$  NMR ( $\text{CDCl}_3$ , 270 MHz)  $\delta$  0.94 (t, 3H,  $J = 7.3$  Hz), 0.99 (t, 3H,  $J = 7.3$  Hz), 1.36-1.75 (m, 7H), 1.81-2.15 (m, 3H), 2.29-2.44 (m, 1H), 4.24-4.32 (m, 1H);  $^{13}\text{C}$  NMR ( $\text{CDCl}_3$ , 68 MHz)  $\delta$  10.95 (q), 11.48 (q), 13.76 (q, two superimposed lines), 17.99 (t), 18.28 (t), 22.83 (t), 23.77 (t), 24.77 (t), 24.85 (t), 26.64 (t), 28.78 (t), 37.33 (t), 38.28 (t), 39.60 (d), 42.01 (d), 77.66 (d), 80.99 (d), 173.71 (s), 175.60 (s); IR(neat)  $1727\text{ cm}^{-1}$ .

**Synthesis of Tetrahydro-2-methyl-2-furanmethanol acetate (3z).** According to the general procedure, after the standard workup, the ether extract was dried over  $\text{MgSO}_4$ . Yields of **3z** and recovered **1z** were quantified by GC using an internal standard (*n*-dodecane) and the



separated samples to calibrate the response of the detector. The spectroscopic data of **3z** isolated by flash chromatography is listed below: a slightly yellow liquid;  $^1\text{H}$  NMR ( $\text{CDCl}_3$ , 270 MHz)  $\delta$  1.44 (s, 3H,  $\text{CH}_3\text{C}$ ), 1.46-1.56 (m, 1H), 1.60-1.70 (m, 1H), 1.76-1.84 (m, 1H), 2.03 (s, 3H,  $\text{CH}_3\text{CO}$ ), 2.16-2.28 (m, 1H), 3.34 (d, 1H,  $J = 11.9$  Hz,  $\text{OCHHC}$ ), 3.49 (td, 1H,  $J = 10.4, 2.7$  Hz,  $\text{OCHHCH}_2$ ), 3.78 (td, 1H,  $J = 4.4, 10.4$  Hz,  $\text{OCHHCH}_2$ ), 4.02 (dd, 1H,  $J = 11.9, 2.0$  Hz,  $\text{OCHHC}$ );  $^{13}\text{C}$  NMR ( $\text{CDCl}_3$ , 68 MHz)  $\delta$  21.52 (q,  $\text{CH}_3\text{C}$ ), 22.18 (q,  $\text{CH}_3\text{CO}$ ), 22.28 (t), 33.77 (t), 67.82 (t,  $\text{OCH}_2$ ), 73.62 (t,  $\text{OCH}_2\text{C}$ ), 77.93 (s,  $\text{CH}_3\text{C}$ ), 170.42 (s); IR(neat)  $1735\text{ cm}^{-1}$ ; CIMS (relative intensity)  $m/z$  159 ( $\text{M}^+ + 1$ , 8), 99 (100), 81 (4), 71 (4), 61 (11); HRCIMS calcd for  $\text{C}_8\text{H}_{15}\text{O}_3$   $m/z$  159.1035, found 159.1028. This compound is already known.<sup>10</sup>

**With Regard to *cis/trans* Assignments of 2,5-Disubstituted Lactones (2k, 2l, 2w and 2m).**

The *cis/trans* assignments of the obtained 2-methyl-5-hexanolide (**2n**) were made rigorously by comparing the obtained spectral and physical data for **2n** with those reported previously by plural groups.<sup>6</sup> For *cis* and *trans* isomers of **2n**, there exist several significant differences in (i) GC elution orders (*cis* comes out faster than *trans*; with OV-1 column), (ii)  $\nu_{\text{CO}}$  in IR spectra (*cis* has a larger frequency number than *trans*), (iii)  $^{13}\text{C}$  NMR chemical shifts of  $\text{C}=\text{O}$  (*cis* has a larger  $\delta$  value than *trans*), and (iv)  $^{13}\text{C}$  NMR chemical shifts of  $\alpha\text{-C}$  and  $\delta\text{-C}$  (*cis* has a smaller  $\delta$  value than *trans*) (Table, run 1 and 2). The *cis/trans* assignments of the other 2,5-disubstituted lactones, **2k**, **2l**, **2w**, and **2m**, were based on the observed similar propensity. The key data are summarized in Table.

---

(10) Mihailović, M. L.; Marinković, D.; Konstantinović, S. *Glas. Hem. Drus. Beograd* **1981**, *46*, 397.

**Table. The Key Data for 2,5-Disubstituted  $\delta$ -Lactones**

| run | $\delta$ -lactone                                                                  | GC<br>elution<br>orders<br>(OV-1) | IR ( $\nu_{\text{CO}}$ )<br><br>$\text{cm}^{-1}$ | $^{13}\text{C}$ NMR<br>chemical shift |             |             |       |
|-----|------------------------------------------------------------------------------------|-----------------------------------|--------------------------------------------------|---------------------------------------|-------------|-------------|-------|
|     |                                                                                    |                                   |                                                  | C=O                                   | $\alpha$ -C | $\delta$ -C |       |
| 1   | 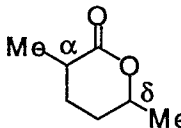  | cis- <b>2n</b>                    | 2                                                | 1732                                  | 176.16      | 32.88       | 74.34 |
| 2   |                                                                                    | trans- <b>2n</b>                  | 1                                                | 1720                                  | 174.29      | 35.65       | 78.10 |
| 3   |   | cis- <b>2k</b>                    | 2                                                | 1736                                  | 175.81      | 37.95       | 77.75 |
| 4   |                                                                                    | trans- <b>2k</b>                  | 1                                                | 1728                                  | 174.03      | 40.60       | 81.02 |
| 5   |   | cis- <b>2l</b>                    | 2                                                | 1736                                  | 175.83      | 37.88       | 79.23 |
| 6   |                                                                                    | trans- <b>2l</b>                  | 1                                                | 1728                                  | 174.07      | 40.60       | 82.40 |
| 7   |   | cis- <b>2w</b>                    | 2                                                | 1736                                  | 175.62      | 37.67       | 74.22 |
| 8   |                                                                                    | trans- <b>2w</b>                  | 1                                                | 1719                                  | 173.95      | 40.22       | 77.60 |
| 9   |  | cis- <b>2m</b>                    | 2                                                | 1728                                  | 174.61      | 43.93       | 74.04 |
| 10  |                                                                                    | trans- <b>2m</b>                  | 1                                                | 1724                                  | 173.25      | 46.35       | 77.29 |
